# Supplementary material for: Influence of Patient Position-Related Differences in Intra- and Postoperative Implications on Major Anesthesia Parameters in Posterior Fossa Surgery
Source: Preprints.org preprint supplement (doi:10.20944/preprints202409.1306.v1), 2024-09-17
Supplement: Supplementary file 1 [file supplementary]

**ABBREVIATIONS**

ASA – American Society of Anesthesiology

BIS – Bispectral Index

CIs  - Confidence Intervals

CNS – Central Nervous System

CSF – Cerebrospinal Fluid

CT – Computer Tomography

ECG - Electrocardiography

EtCO2 – End-Tidal CO2

IQR – Interquartile Range

MEPs – Motor Evoked Potentials

ORs – Odds Ratio

SDs – Standard Deviation

SSEPs – Somatosensitive Evoked Potentials

TOF – Train of Four

VAE – Venous Air Embolism

VCS/ETV – Ventriculocisternostomy/Endoscopic Third Ventriculostomy

VPD – Ventriculoperitoneal Drainage
